1 **Headwaters fed by subterranean ice: potential climate refugia for mountain stream**  
2 **communities?**

3

4 Lusha M. Tronstad<sup>1,\*</sup>, Scott Hotaling<sup>2,\*</sup>, J. Joseph Giersch<sup>3</sup>, Oliver J. Wilmot<sup>4</sup>, and Debra S.  
5 Finn<sup>5</sup>

6

7 **Affiliations:**

8 <sup>1</sup> Wyoming Natural Diversity Database, University of Wyoming, Laramie, WY, USA

9 <sup>2</sup> School of Biological Sciences, Washington State University, Pullman, WA, USA;

10 [scott.hotaling@wsu.edu](mailto:scott.hotaling@wsu.edu)

11 <sup>3</sup> U.S. Geological Survey, Northern Rocky Mountain Science Center, West Glacier, MT, USA;

12 [jgiersch@usgs.gov](mailto:jgiersch@usgs.gov)

13 <sup>4</sup> Wyoming Natural Diversity Database, University of Wyoming, Laramie, WY, USA;

14 [owilmot@uwyo.edu](mailto:owilmot@uwyo.edu)

15 <sup>5</sup> Department of Biology, Missouri State University, Springfield, MO, USA;

16 [DFinn@MissouriState.edu](mailto:DFinn@MissouriState.edu)

17 \* Contributed equally

18

19 **Correspondence:** Lusha M. Tronstad, Wyoming Natural Diversity Database, University of  
20 Wyoming, 1000 E. University Ave., Laramie, WY 82071 USA; Phone: (307) 766-3115; Email:

21 [tronstad@uwyo.edu](mailto:tronstad@uwyo.edu)

22

23 **Running head:** Mountain stream climate refugia

24  
25  
26  
27  
28  
29  
30  
31  
32  
33  
34  
35  
36  
37  
38  
39  
40  
41

## ABSTRACT

Near-term extirpations of macroinvertebrates are predicted for mountain streams worldwide as a warming climate drives the recession of high-elevation ice and snow. However, hydrological sources likely vary in their resistance to climate change. Streams fed by more resistant sources could persist as climate refugia for imperiled biota. In 2015-2016, we measured habitat characteristics and quantified macroinvertebrate community structure along six alpine streams in the Teton Range, Wyoming, USA. Strong differences in habitat characteristics (e.g., temperature, bed stability, conductivity) confirmed three major alpine stream sources: surface glaciers, perennial snowfields, and subterranean ice. Subterranean ice-fed streams – termed “icy seeps” – are common but globally understudied. Macroinvertebrate communities in glacier- and snowmelt-fed streams differed significantly in multivariate space, with icy-seep communities intermediate, incorporating components of both glacier- and snowmelt-fed assemblages. Because the thermal environment of subterranean ice, including rock glaciers, is decoupled from large-scale climatic conditions, we predict that icy seeps may persist longer on the landscape than streams fed by surface ice and snow sources. Our results suggest that icy seeps are suitable habitat for many macroinvertebrates occupying streams fed by vulnerable hydrological sources. Thus, icy seeps may act as key climate refugia for mountain stream biodiversity, an idea in need of further investigation.

42

## INTRODUCTION

43           The highest rates of climate change are occurring above the permanent treeline in alpine  
44 and arctic ecosystems (Bradley et al. 2006). In the Rocky Mountains, warming is proceeding two  
45 to three times more quickly than the global average (Hansen et al. 2005, Pederson et al. 2010),  
46 resulting in extensive loss of glaciers and long-term snowpack (Hall & Fagre 2003). Streams fed  
47 by permanent ice may exhibit short-term increases in flow as air temperature rises and source ice  
48 melts more quickly, but eventually they will shift to reduced flow with the potential for  
49 intermittency or drying permanently (Hotaling et al. 2017a). As climate change proceeds,  
50 invertebrate diversity at the mountain range scale is predicted to decrease due to both overall loss  
51 of habitat and summit traps, where the highest-altitude species and communities have nowhere  
52 left to disperse as warmer conditions and lower elevation communities shift upward. Biodiversity  
53 loss will be compounded by the loss of specific aquatic habitat types, particularly the unique  
54 conditions associated with meltwater from once-permanent sources like glaciers, snowfields, or  
55 subterranean ice (Brown et al. 2007, Milner et al. 2009, Jacobsen et al. 2012, Finn et al. 2013a,  
56 2013b, Hotaling et al. 2017a). Given that many alpine stream communities appear adapted to  
57 unique, meltwater-associated regimes, they are likely to be highly vulnerable to climate change  
58 (Giersch et al. 2017, Lencioni 2018). However, because alpine streams are heterogeneous with  
59 respect to hydrological source, the potential also exists to identify stream types that may be  
60 locally buffered from broad-scale climate patterns and therefore represent potential climate  
61 refugia for alpine stream biota (Morelli et al. 2016).

62           A major focus of alpine stream biology is understanding the links between hydrological  
63 sources, the in-stream conditions they promote, and resident biotic communities (Ward 1994,  
64 Hotaling et al. 2017a). Historically, according to primary hydrological source, three types of

65 alpine streams have been recognized, following Ward (1994): surface glacier-fed, snowmelt-fed,  
66 and groundwater-fed streams. A fourth, understudied stream type exists – icy seeps – which are  
67 fed by subterranean ice (Hotaling et al. 2017a, Hotaling et al. 2019a). The most common form of  
68 subterranean ice in alpine zones is rock glaciers, masses of debris-covered ice that act as  
69 conveyor belts moving fallen rock and other debris slowly downhill (Anderson et al. 2018).  
70 There may be more than 10,000 rock glaciers in the western United States (Johnson 2018) and  
71 they also appear common in mountainous regions worldwide (e.g., Lilleøren et al. 2011, Scotti et  
72 al. 2013, Charbonneau & Smith. 2018). In contrast, there are ~1,250 surface glaciers and ~3,750  
73 perennial snowfields in the western United States (Fountain et al. 2017). Thermal conditions in  
74 rock glaciers are decoupled from ambient climate due to insulating debris cover (Clark et al.  
75 1994, Anderson et al. 2018, Knight et al. 2019) and local-scale air circulation patterns (Millar et  
76 al. 2013). In a climate change context, an intriguing aspect of rock glaciers and other  
77 subterranean ice is their potential to persist on the landscape longer than surface glaciers,  
78 snowfields, and other more vulnerable sources of alpine streams. Icy seeps therefore may act as  
79 climate refugia for cold-adapted stream organisms (Hotaling et al. 2019a).

80 Population genetic studies of alpine-endemic species of the Rocky Mountains have  
81 revealed substantial genetic structure across relatively short geographic distances (Finn et al.  
82 2006, Hotaling et al. 2018, 2019b), suggesting that mountaintop populations have evolved in  
83 considerable isolation. This process contributes to the elevated *beta* (among-stream) diversity of  
84 alpine streams (Brown et al. 2007, Jacobsen et al. 2012, Finn et al. 2013a), but genetic isolation  
85 and small population sizes can lead to bottlenecks and/or inbreeding depression in alpine-  
86 endemic species that are undergoing range contraction (e.g., Jordan et al. 2016). Like many  
87 mountain ranges worldwide, virtually nothing is known of alpine stream ecology and

88 biodiversity in the Teton Range, a granite-dominated, young subrange of the Rocky Mountains.  
89 Previous studies of montane (but not alpine) streams revealed high diversity in streams in the  
90 range, particularly when compared to nearby lentic habitats (Tronstad et al. 2016, Hotaling et al.  
91 2017b). Generally speaking, groundwater aquifers are rare in the Teton Range massif, and as  
92 such, groundwater-fed streams are also virtually non-existent (L.M.T., personal observation).  
93 Because groundwater-fed streams are traditionally considered to be the alpine stream type most  
94 resistant to warming (e.g., Milner et al. 2009, Jacobsen et al. 2012), their rarity in the Teton  
95 Range suggests alpine stream biodiversity in the region may be especially vulnerable to climate  
96 change.

97         In this study, we addressed two major objectives. First, we sought to provide the first  
98 assessment of alpine stream macroinvertebrate communities in the Teton Range. Second, we  
99 explored associations between primary hydrological sources (surface glaciers, snowfields, and  
100 subterranean ice) and community structure. Specifically, we asked if benthic communities  
101 associated with icy seeps have substantial taxonomic overlap with the more vulnerable stream  
102 types (glacier- and snowmelt-fed streams). Our study provides a preliminary look into whether  
103 an underappreciated but globally common alpine stream type – icy seeps – may act as refugia for  
104 ecological patterns and processes threatened by global change in mountain ecosystems.  
105 Furthermore, our results provide new insight into the biodiversity in one of North America’s  
106 flagship protected areas, Grand Teton National Park, and neighboring wilderness areas.

107

108

## **MATERIALS AND METHODS**

109

### Study area

110           During the summers of 2015 and 2016 (26 July-10 August), we sampled six streams in  
111 the Teton Range of Grand Teton National Park and the adjacent Jeddiah Smith Wilderness in  
112 northwestern Wyoming, USA (Figure 1; Table 1). Study streams were selected to span the  
113 breadth of alpine hydrological sources in the range and included two streams fed by surface  
114 glaciers (‘glacier-fed’ hereafter), two fed by subterranean ice (‘icy seep’ hereafter) and two fed  
115 by permanent snowpack (‘snowmelt-fed’). In 2015, we sampled both upstream (near the source)  
116 and downstream sites on each stream (Figure 1). On average, upper sites were 111 m higher in  
117 elevation and 690 m stream distance from lower sites (Table 1). In 2016, we re-sampled the  
118 upper sites with the same methods to assess inter-annual variability. We focused on upper sites  
119 because they were as ‘true’ to primary hydrological source as possible while lower sites  
120 inherently reflected various degrees of mixing among sources. In both years, snow depth in the  
121 range was lower than average (152 cm in May, 1981-2010) with 2015 and 2016 at 63.3% and  
122 80% of normal, respectively (Teton Pass, USDA SNOTEL).

123

#### 124                               Environmental data

125           At each site, we measured several environmental variables to characterize local habitat  
126 and evaluate whether instream environmental conditions varied among stream types. We  
127 measured water temperature for a full year (2015-2016) with *in situ* loggers (HOBO Pro v2,  
128 Onset Computer Corporation) that recorded temperature hourly. We measured specific  
129 conductivity (SPC), oxidation-reduction potential (ORP), pH, and dissolved oxygen (DO) with a  
130 Yellow Springs Instrument (YSI) Professional Plus multiparameter sonde calibrated at the  
131 trailhead (SPC, ORP, and pH) or at each site (DO). We estimated streambed stability with a  
132 modified version of the Pfankuch Index (PI) following Peckarsky et al. (2014). Total suspended

133 sediments (TSS) were measured by filtering known volumes of streamwater through pre-  
134 weighed filters (PALL Type A/E glass fiber filters) and measuring dry mass to the  $10^{-5}$  grams.

135 Using the annual temperature data from each stream, we calculated mean temperature for  
136 the entire year ( $T_{\text{YEAR}}$ ), mean temperature between the summer solstice (21 June) and autumn  
137 equinox (22 September;  $T_{\text{SUMMER}}$ ), and maximum annual temperature range ( $T_{\text{RANGE}}$ ). We also  
138 estimated the date when seasonal snow covered ( $S_{\text{ON}}$ ) and uncovered ( $S_{\text{OFF}}$ ) each site by visually  
139 inspecting thermographs to approximate the date when intraday variation ceased and in-stream  
140 temperatures became constantly  $\sim 0^{\circ}\text{C}$  ( $S_{\text{ON}}$ ) or the opposite occurred ( $S_{\text{OFF}}$ ). Using these values,  
141 we calculated  $S_{\text{DURATION}}$ , the total days a site was snow covered between study years ( $S_{\text{DURATION}}$   
142 =  $S_{\text{ON}} - S_{\text{OFF}}$ ). Finally, we used Principle Components Analysis (PCA; PC-ORD, McCune and  
143 Mefford 2006) to characterize the upper sites on each stream according to four variables (SPC,  
144 TSS, PI,  $T_{\text{RANGE}}$ ) which comprise a modified ‘glaciation index’ (Ilg & Castella 2006). The  
145 glaciation index has been useful in characterizing alpine stream hydrological sources globally  
146 (e.g., Finn et al. 2013a, Cauvy-Fraunié et al. 2015).

147

#### 148 Macroinvertebrate sampling

149 We quantitatively sampled benthic macroinvertebrates at each site using a Surber sampler  
150 (Area:  $0.09 \text{ m}^2$ , Mesh size:  $243 \mu\text{m}$ ). At each location, a composite sample of 5-10 replicates was  
151 collected depending on stream size, apparent biomass, and microhabitat diversity. Samples were  
152 elutriated in the field to reduce the amount of inorganic substrate and stored in Whirl-Pak bags  
153 with  $\sim 80\%$  ethanol. In the laboratory, invertebrate samples were divided into large ( $>2 \text{ mm}$   
154 mesh) and small (between  $250 \mu\text{m}$  and  $2 \text{ mm}$ ) fractions. For the large fraction, all invertebrates  
155 were identified. The small fraction was subsampled using the record player method when smaller

156 invertebrates were numerous (Waters 1969). Invertebrates were sorted, identified to the lowest  
157 taxonomic level possible and counted under a dissecting microscope using keys in Merritt et al.  
158 (2008) and Thorp & Covich (2010). Insects were typically identified to genus when mature  
159 specimens were present, except Chironomidae which were classified into two groups,  
160 Tanypodinae or non-Tanypodinae. We estimated density by summing the total number of  
161 individuals for a given site and dividing by the area of streambed sampled. We calculated  
162 biomass by measuring the length of the first 20 individuals of each taxon and then using length-  
163 mass regressions to estimate individual biomass (Benke et al. 1999). We multiplied the mean  
164 individual biomass for each taxon by the total number collected to estimate total biomass.

165

#### 166 Biological data analysis

167 We used analysis of variance (ANOVA) statistical tests and the R package ‘plyr’ (R Core  
168 Development Team 2017; Wickham 2011) to characterize differences in invertebrate density,  
169 biomass and richness among stream types. When stream type was significant ( $\alpha = 0.05$ ), we used  
170 Tukey’s HSD to distinguish which stream types differed from one another ( $P \leq 0.05$ ). Our use of  
171 Tukey’s HSD tests was highly conservative, given the small sample size of streams in this  
172 preliminary study. To assess the relationship between taxonomic richness or biomass with stream  
173 characteristics of interest ( $S_{\text{DURATION}}$ ,  $T_{\text{SUMMER}}$ , Pfankuch Index), we performed both Pearson and  
174 Spearman’s rank-order correlations using the R package ‘Hmisc’ (Harrell Jr. 2013). For  
175 correlation analyses, taxonomic richness and biomass were averaged for 2015 and 2016 for each  
176 upper site.

177 We evaluated differences in community structure across streams, sites, and years using  
178 non-metric multidimensional scaling (NMS) with PC-ORD (McCune & Mefford 2006). We



179  $\log_{10}(n + 1)$  transformed density data for all taxa, removed rare taxa (either those private to a  
180 single site in the matrix and/or representing < 1% of the total abundance), and used Sørensen's  
181 dissimilarities to create distance matrices. We ran NMS analyses independently on two data  
182 matrices: one including each of the upper and lower sites collected in 2015 only (N = 12 sites)  
183 and the other including only the upper sites (sampled in both 2015 and 2016; N = 12 sites).  
184 Dimensionality of the final solutions was chosen as the number of axes that produced the lowest  
185 stress following 200 iterations. Following NMS we applied multi-response permutation  
186 procedures (MRPP) in PC-ORD to assess whether there were differences in either community  
187 structure and/or mean community distance within the following groups: upstream compared to  
188 downstream sites in 2015 and among the three stream types for the upper sites only (2015 +  
189 2016).

190

191

## RESULTS

192

### Environmental variation

193

194

195

196

197

198

199

200

201

The upper sites of our study streams clearly separated into three groups according to the  
glaciation index: glacier-fed streams, snowmelt-fed streams, and icy seeps (Figure 2; Table 2).  
Streambed stability, measured by the Pfankuch Index (Peckarsky et al. 2014), was highest in  
snowmelt-fed streams and lowest in glacier-fed streams (Table 2). Annual temperature range  
( $T_{\text{RANGE}}$ ) was highest in snowmelt-fed streams and lowest in icy seeps. Specific conductivity was  
highest in icy seeps ( $\text{SPC} > 100 \mu\text{S cm}^{-1}$  at upper sites) and minimal in the other two stream types  
(Table 2). Total suspended solids (TSS) was highest in glacier-fed streams (mean TSS, glacier-  
fed = 0.157 g/L, Table 2), indicating active glacier beds were present upstream. Summer  
temperature ( $T_{\text{SUMMER}}$ ) was low in glacier-fed streams (mean = 1.6 °C) and icy seeps (mean =

202 2.2 °C), and higher in snowmelt-fed streams (mean = 6.9 °C; Table 2).  $T_{\text{SUMMER}}$  was correlated  
203 with  $T_{\text{RANGE}}$  and therefore excluded from the PCA. Upper sites were on average 1.2°C colder in  
204 the summer and had less stable stream beds than lower sites (mean PI, upper = 27; mean PI,  
205 lower = 20.33; Table 1). Other environmental metrics (i.e., DO, pH, ORP, days under snow) did  
206 not vary consistently among stream types or between upper and lower sites (Table 2).

207

## 208 Biological variation

209 We collected a total of 35 invertebrate taxa of which 28 were insects (Supplementary  
210 Appendix 1). Insects composed 95% of the total mean densities and 92% of the total biomass.  
211 The highest densities, biomass, and richness of invertebrate communities were collected in  
212 snowmelt-fed streams. Total macroinvertebrate density did not differ among stream types ( $F =$   
213 1.3,  $df = 2$ ,  $P = 0.31$ ; Figure 3A), but biomass was ~7x higher in snowmelt-fed streams compared  
214 to glacier-fed streams and icy seeps ( $F = 7.1$ ,  $df = 2$ ,  $P < 0.009$ ; Tukey's HSD,  $P \leq 0.02$ ; Figure  
215 3B). Additionally, invertebrate richness was ~2x higher in snowmelt-fed streams than glacier-fed  
216 streams and icy seeps ( $F = 10.4$ ,  $df = 2$ ,  $P < 0.002$ , Tukey's HSD,  $P < 0.008$ ; Figure 3C). We  
217 observed generally higher and more variable densities ( $F = 2.7$ ,  $df = 1$ ,  $P = 0.13$ ; Figure 3D) and  
218 higher biomass ( $F = 2.6$ ,  $df = 1$ ,  $P = 0.13$ ; Figure 3E) at the lower sites. We also observed ~50%  
219 more taxa at lower versus upper sites ( $F = 8.5$ ,  $df = 1$ ,  $P = 0.012$ ; Figure 3F). Pearson  
220 correlations between richness or biomass and  $S_{\text{DURATION}}$ ,  $T_{\text{SUMMER}}$ , or streambed stability  
221 indicated that only  $T_{\text{SUMMER}}$  was significantly correlated with the biological responses (Richness:  
222 Pearson  $r = 0.81$ ,  $P = 0.002$ ; Biomass: Pearson  $r = 0.63$ ,  $P = 0.038$ ; Figure 4). Spearman's rank-  
223 order correlations of the same relationships exhibited similar patterns, again with only  $T_{\text{SUMMER}}$

224 exhibiting significant correlations with richness (Spearman's  $r = 0.89$ ,  $P = 0.003$ ) and biomass  
225 (Spearman's  $r = 0.67$ ,  $P = 0.023$ ).

226 The most stable NMS solution for comparing community structure between upper and  
227 lower sites in 2015 was three-dimensional (stress = 9.6). The first two axes explained 88% of the  
228 total variation. Communities from the six lower sites overlapped substantially in ordination space  
229 with communities from the six upper sites (MRPP  $A = 0.013$ ;  $P = 0.27$ ). However, the mean  
230 pairwise community distance was greater among the upper sites than the lower (0.58 vs. 0.47), a  
231 trend that is apparent in the NMS bi-plot (Figure 5A) as a constriction of the total ordination  
232 space occupied by lower sites compared to the increased space occupied by the upper sites.

233 The NMS analysis that included upper sites only (2015 and 2016) converged on a two-  
234 dimensional solution as the most stable result (stress = 8.9). The two axes explained 86% of the  
235 total variation, with axis-1 alone explaining 70% of the variation. In general, communities  
236 occupying glacier-fed streams had the lowest axis-1 values, communities in snowmelt-fed  
237 streams had the highest axis-1 values and icy seep communities had intermediate axis-1 values  
238 (Figure 5B). MRPP results suggested that communities occupying these three stream types were  
239 significantly different from one another ( $A = 0.19$ ;  $P = 0.006$ ). Pairwise differences were strong  
240 between glacier-fed and snowmelt-fed communities ( $A = 0.21$ ;  $P = 0.005$ ) and were weaker but  
241 significant for the two pairs that included icy seep communities (icy seep vs. glacier-fed:  $A =$   
242  $0.11$ ;  $P = 0.05$ ; icy seep vs. snowmelt:  $A = 0.12$ ;  $P = 0.03$ ).

243

244

## DISCUSSION

245

246 clearer understanding of how patterns of extant biodiversity and habitat heterogeneity are linked

247 in high-elevation ecosystems. In this study, we provide the first description of macroinvertebrate  
248 diversity in the high Teton Range, Wyoming, where three primary stream types exist: glacier-fed  
249 streams, snowmelt-fed streams, and icy seeps. To the best of our knowledge, no streams fed by  
250 groundwater aquifers have been documented in the alpine zone of the granitic Teton Range.  
251 From a global perspective, icy seeps, which are fed by subterranean ice (primarily by rock  
252 glaciers), rather than aquifers of liquid water, are of particular interest as they are likely to persist  
253 on the landscape longer than surface ice features (Hotaling et al. 2019a). For the Teton Range, a  
254 scarcity of groundwater-fed streams suggests that biodiversity in the region may be even more  
255 reliant on meltwater than other high-alpine regions (e.g., European ranges, Brown et al. 2007;  
256 tropical Andes, Finn et al. 2016; Glacier National Park, Giersch et al. 2017), and thus may be  
257 especially reliant on icy seep-associated climate refugia in the decades to come. In the streams  
258 sampled for this study, glacier- and snowmelt-fed streams exhibited significantly different  
259 invertebrate communities; however, icy seeps were intermediate between the two in terms of  
260 community structure and invertebrate density, biomass, and richness. These results suggest that  
261 icy seep communities share some characteristics with both glacier- and snowmelt-fed streams  
262 and might have the potential to act as climate refugia for at least a subset of the unique  
263 communities present in each of the other more vulnerable stream types. Thus, the potential for  
264 icy seeps and ice-influenced terrestrial refugia (Millar et al. 2015) to buffer climate-induced  
265 biodiversity loss has profound, global implications.

266         The recession of meltwater sources is predicted to strongly affect downstream  
267 invertebrate communities (Jacobsen et al. 2012). In the near term, rising in-stream temperatures  
268 are expected as ice melt comprises ever smaller proportions of stream flow. In alpine streams  
269 worldwide, warmer conditions have been correlated with increased species richness for microbial

270 diversity (e.g., Wilhelm et al. 2013, Hotaling et al. 2019a), diatoms (Fell et al. 2018) and  
271 macroinvertebrates (Finn & Poff 2005, Jacobsen et al. 2012). Our study adds another line of  
272 evidence to this global pattern as we detected a positive correlation between species richness and  
273 mean summer temperature ( $T_{\text{SUMMER}}$ ) for macroinvertebrate communities of the Teton Range.  
274 We also observed greater richness at lower (mean = 15 taxa) versus upper (mean = 10 taxa) sites.  
275 This finding also aligned with, and extended, the conclusions of Tronstad et al. (2016), the only  
276 other study to investigate longitudinal patterns of macroinvertebrate richness in montane streams  
277 of the Teton Range. We observed far fewer taxa at our highest elevation sites (10 taxa; ~3,150  
278 m) versus the highest elevation sites included in Tronstad et al. (2016): 26 taxa at ~2,700 m.

279         Although local (alpha) diversity is expected to increase with warming water  
280 temperatures, among-stream (beta) diversity may decrease as more diverse communities shift  
281 upstream, effectively homogenizing biological diversity at the regional scale (Jacobsen et al.  
282 2012, Wilhelm et al. 2013, Hotaling et al. 2017a). In the Teton Range, we observed greater beta  
283 diversity among our upper sample sites than our lower sites, even with wide variation in  
284 landscape features (e.g., a lake separating stream reaches at one of our sites) and variable  
285 distances between upper and lower sites among our six focal streams. This spatial pattern  
286 suggests that in the Teton Range, like elsewhere in the world, heterogeneous hydrological  
287 sources bolster regional-scale alpine stream biodiversity.

288         Ultimately, the degree to which alpine streams will be affected by climate change in  
289 terms of flow magnitude and persistence remains largely unknown. While many studies of alpine  
290 streams operate under the assumption that perennial flow will continue for many streams in the  
291 decades to come (e.g., Jacobsen et al. 2012), this may not be the case (e.g., Haldorsen & Heim  
292 1999). Thus, the biological ramifications of declining meltwater sources in places like the Teton

293 Range, where groundwater aquifer-fed springs are scarce, may be even more profound than in  
294 ranges with a greater diversity of alpine stream sources (e.g., Glacier National Park, Giersch et  
295 al. 2017). Indeed, if alpine streams supported by surface glaciers and permanent snowfields  
296 transition to intermittency or dry completely, the future of biodiversity in these ecosystems may  
297 depend almost exclusively on icy seeps. Our study paired with the broader glaciological  
298 literature, however, suggests that there is room for optimism in this regard. Indeed, icy seeps  
299 have the potential to span a wide beta diversity profile, perhaps bridging the taxonomic gap  
300 between glacier- and snowmelt-fed communities (e.g., Hotaling et al. 2019a). Moreover, rock  
301 glaciers and other subterranean ice forms are common in alpine regions worldwide and likely the  
302 most resistant ice form to future warming. Clearly, research focused on subterranean ice sources  
303 and associated icy seeps, and the biological communities they support, represents a pressing need  
304 in alpine stream biology. We suggest that future studies incorporate temporal monitoring of  
305 alpine stream types, including icy seeps, to explicitly test how biodiversity and habitat  
306 characteristics may be altered across alpine stream types as climate change proceeds.

307

308

#### **ACKNOWLEDGEMENTS**

309 Financial support was provided by The University of Wyoming-National Park Service Research  
310 Station and the Teton Conservation District. We thank Lydia Zeglin for assistance in the field  
311 and Hanna Foster, Logan Fox, Alexis Lester, Jackson Marr, Jake Ruthven, Joe Wannemuehler,  
312 and Kara Wise who helped sort invertebrate samples. Matthew Green provided helpful  
313 comments on the manuscript. Any use of trade, firm, or product names is for descriptive  
314 purposes only and does not imply endorsement by the U.S. Government.

315

316  
317  
318  
319  
320  
321  
322  
323  
324  
325  
326  
327  
328  
329  
330  
331  
332  
333  
334  
335  
336

## LITERATURE CITED

Anderson, R. S., L. S. Anderson, W. H. Armstrong, M. W. Rossi & S. E. Crump. 2018. Glaciation of alpine valleys: the glacier – debris-covered glacier – rock glacier continuum. *Geomorphology* 311:127-142.

Benke, A. C., A. D. Huryn, L. A. Smock & J. B. Wallace. 1999. Length-mass relationships for freshwater macroinvertebrates in North America with particular reference to the Southeastern United States. *Journal of the North American Benthological Society* 18:308-343.

Bradley, R. S., M. Vuille, H. F. Diaz & W. Vergara. 2006. Threats to water supplies in the tropical Andes. *Science* 312:1755-1756.

Brown, L. E., D. M. Hannah & A. M. Milner. 2007. Vulnerability of alpine stream biodiversity to shrinking glaciers and snowpacks. *Global Change Biology* 13:958-966.

Cauvy-Fraunié, S., R. Espinosa, P. Andino, D. Jacobsen & O. Dangles. 2015. Invertebrate metacommunity structure and dynamics in an Andean glacial stream network facing climate change. *PLoS ONE* 10:e0136793.

Charbonneau, A. A. & D. J. Smith. 2018. An inventory of rock glaciers in the central British Columbia Coast Mountains, Canada, from high resolution Google Earth imagery. *Arctic, Antarctic, and Alpine Research* 50:e1489026.

Clark, D. H., M. M. Clark & A. R. Gillespie, 1994. Debris-covered glaciers in the Sierra Nevada, California, and their implications for snowline reconstructions. *Quaternary Research* 41:139-153.

- 337 Fell, S. C., J. L. Carrivick, M. G. Kelly, L. Füreder & L. E. Brown. 2018. Declining glacier cover  
338 threatens the biodiversity of alpine river diatom assemblages. *Global Change Biology*  
339 24(12):5828-5840.
- 340 Finn, D. S., A. C. Encalada & H. Hampel. 2016. Genetic isolation among mountains but not  
341 between stream types in a tropical high-altitude mayfly. *Freshwater Biology* 61(5):702-  
342 714.
- 343 Finn, D. S., K. Khamis & A. M. Milner. 2013a. Loss of small glaciers will diminish beta  
344 diversity in Pyrenean streams at two levels of biological organization. *Global Ecology*  
345 and *Biogeography* 22:40-51.
- 346 Finn, D. S. & N. L. Poff. 2005. Variability and convergence in benthic communities along the  
347 longitudinal gradients of four physically similar Rocky Mountain streams. *Freshwater*  
348 *Biology* 50:243-261.
- 349 Finn, D. S., D. M. Theobald, W. C. Black & N. L. Poff. 2006. Spatial population genetic  
350 structure and limited dispersal in a Rocky Mountain alpine stream insect. *Molecular*  
351 *ecology* 15:3553–3566.
- 352 Finn, D. S., C. Zamora-Muñoz, C. Múrria, M. Sáinz-Bariáin & J. Alba-Tercedor. 2013b.  
353 Evidence from recently deglaciated mountain ranges that *Baetis alpinus* (Ephemeroptera)  
354 could lose significant genetic diversity as alpine glaciers disappear. *Freshwater Science*  
355 33:207-216.
- 356 Fountain, A. G., B. Glenn & H. J. Basagic. 2017. The geography of glaciers and perennial  
357 snowfields in the American West. *Arctic, Antarctic, and Alpine Research* 49:391-410.



- 358 Giersch, J. J., S. Hotaling, R. P. Kovach, L. A. Jones & C. C. Muhlfeld. 2017. Climate-induced  
359 glacier and snow loss imperils alpine stream insects. *Global Change Biology* 23(7):2577–  
360 2589.
- 361 Giersch, J. J., S. Jordan, G. Luikart, L. A. Jones, F. R. Hauer & C. C. Muhlfeld. 2015. Climate-  
362 induced range contraction of a rare alpine aquatic invertebrate. *Freshwater Science* 34:53-  
363 65.
- 364 Haldorsen, S. & M. Heim, 1999. An Arctic groundwater system and its dependence upon  
365 climatic change: An example from Svalbard. *Permafrost and Periglacial Processes*  
366 10:137-149.
- 367 Hall, M. H. P. & D. B. Fagre. 2003. Modeled climate-induced glacier change in Glacier National  
368 Park, 1850-2100. *Bioscience* 53:131-140.
- 369 Hansen, J., L. Nazarenko, R. Ruedy, M. Sato, J. Willis, A. Del Genio, D. Koch, A. Lacis, K. Lo,  
370 S. Menon, T. Novakov, J. Perlwitz, G. Russell, G. A. Schmidt & N. Tausnev. 2005.  
371 Earth's energy imbalance: confirmation and implications. *Science* 308:1431-1435.
- 372 Harrell, F. E. J. 2013. Hmisc: Harrell miscellaneous. R package version 3.12-2. [Computer  
373 software]. Available from <http://cran.R-project.org/web/packages/Hmisc>.
- 374 Hotaling, S., D. S. Finn, J. J. Giersch, D. W. Weisrock & D. Jacobsen. 2017a. Climate change  
375 and alpine stream biology: progress, challenges, and opportunities for the future.  
376 *Biological Reviews* 92:2024-2045.
- 377 Hotaling, S., M. Foley, L. Zeglin, D. Finn, L. Tronstad, J. Giersch, C. Muhlfeld & D. W.  
378 Weisrock. 2019a. Microbial assemblages reflect environmental heterogeneity in alpine  
379 streams. *Global Change Biology*.

- 380 Hotaling, S., J. J. Giersch, D. S. Finn, L. M. Tronstad, S. Jordan, L. E. Serpa, R. G. Call, C. C.  
381 Muhlfeld & D. W. Weisrock. 2019b. Congruent population genetic structure but differing  
382 depths of divergence for three alpine stoneflies with similar ecology and geographic  
383 distributions. *Freshwater Biology* 64:335-347.
- 384 Hotaling, S., C. C. Muhlfeld, J. J. Giersch, O. A. Ali, S. Jordan, M. R. Miller, G. Luikart & D.  
385 W. Weisrock. 2018. Demographic modelling reveals a history of divergence with gene  
386 flow for a glacially tied stonefly in a changing post-Pleistocene landscape. *Journal of*  
387 *Biogeography* 45:304-317.
- 388 Hotaling, S., L. M. Tronstad & J. C. Bish. 2017b. Macroinvertebrate richness is lower in high-  
389 elevation lakes vs nearby streams: evidence from Grand Teton National Park, Wyoming.  
390 *Journal of Natural History* 51:1657-1669.
- 391 Ilg, C. & E. Castella. 2006. Patterns of macroinvertebrate traits along three glacial stream  
392 continuums. *Freshwater Biology* 51:840-853.
- 393 Jacobsen, D., A. M. Milner, L. E. Brown & O. Dangles. 2012. Biodiversity under threat in  
394 glacier-fed river systems. *Nature Climate Change* 2:361–364.
- 395 Johnson, G. F. 2018. Rock Glaciers of the Contiguous United States: Spatial Distribution,  
396 Cryospheric Context, and Riparian Vegetation. *Dissertations and Theses* 4507:1-147.
- 397 Jordan, S., J. J. Giersch, C. C. Muhlfeld, S. Hotaling, L. Fanning, T. H. Tappenbeck & G.  
398 Luikart. 2016. Loss of genetic diversity and increased subdivision in an endemic alpine  
399 stonefly threatened by climate change. *PLoS ONE* 11(6):e0157386.
- 400 Knight, J., S. Harrison & D. B. Jones. 2019. Rock glaciers and the geomorphological evolution  
401 of deglaciating mountains. *Geomorphology* 324:14-24.

- 402 Lencioni, V. 2018. Glacial influence and stream macroinvertebrate biodiversity under climate  
403 change: Lessons from the Southern Alps. *Science of The Total Environment* 622:563-  
404 575.
- 405 Lilleøren, K. S. & B. Etzelmüller. 2011. A regional inventory of rock glaciers and ice-cored  
406 moraines in Norway. *Geografiska Annaler: Series A, Physical Geography* 93:175-191.
- 407 McCune, B. & M. Mefford. 2006. PC-ORD. Multivariate analysis of ecological data. Version 5.
- 408 Merritt, R. W., K. W. Cummins & M. B. Berg. 2008. *An Introduction To The Aquatic Insects of*  
409 *North America*, 4th Edition. Kendall/Hunt Publishing Company, Dubuque, Iowa.
- 410 Millar, C. I., R. D. Westfall & D. L. Delany. 2013. Thermal and hydrologic attributes of rock  
411 glaciers and periglacial talus landforms: Sierra Nevada, California, USA. *Quaternary*  
412 *International* 310:169-180.
- 413 Millar, C. I., R. D. Westfall, A. Evenden, J. G. Holmquist, J. Schmidt-Gengenbach, R. S.  
414 Franklin, J. Nachlinger & D. L. Delany. 2015. Potential climatic refugia in semi-arid,  
415 temperate mountains: Plant and arthropod assemblages associated with rock glaciers,  
416 talus slopes, and their forefield wetlands, Sierra Nevada, California, USA. *Quaternary*  
417 *International* 387:106-121.
- 418 Milner, A. M., L. E. Brown & D. M. Hannah. 2009. Hydroecological response of river systems  
419 to shrinking glaciers. *Hydrological Processes* 23:62-77.
- 420 Morelli, T. L., C. Daly, S. Z. Dobrowski, D. M. Dulen, J. L. Ebersole, S. T. Jackson, J. D.  
421 Lundquist, C. I. Millar, S. P. Maher, W. B. Monahan, K. R. Nydick, K. T. Redmond, S.  
422 C. Sawyer, S. Stock & S. R. Beissinger. 2016. Managing climate change refugia for  
423 climate adaptation. *PLoS ONE* 11:e0159909.

- 424 Peckarsky, B. L., A. R. McIntosh, S. C. Horn, K. McHugh, D. J. Booker, A. C. Wilcox, W.  
425 Brown & M. Alvarez. 2014. Characterizing disturbance regimes of mountain streams.  
426 *Freshwater Science* 33:716-730.
- 427 Pederson, G. T., L. J. Graumlich, D. B. Fagre, T. Kipfer & C. C. Muhlfeld. 2010. A century of  
428 climate and ecosystem change in Western Montana: what do temperature trends portend?  
429 *Climatic Change* 98:133-154.
- 430 R Development Core Team. 2017. R: A language and environment for statistical computing. R  
431 Foundation for Statistical Computing, Vienna, Austria. URL <http://www.R-project.org>.
- 432 Scotti, R., F. Brardinoni, S. Alberti, P. Frattini & G. B. Crosta. 2013. A regional inventory of  
433 rock glaciers and protalus ramparts in the central Italian Alps. *Geomorphology* 186:136-  
434 149.
- 435 Thorp, J. H. & A. P. Covich (eds). 2010. *Ecology and Classification of North American*  
436 *Freshwater Invertebrates*. 3rd edition. Academic Press, London.
- 437 Tronstad, L. M., S. Hotaling & J. C. Bish. 2016. Longitudinal changes in stream invertebrate  
438 assemblages of Grand Teton National Park, Wyoming. *Insect Conservation and Diversity*  
439 9:320-331.
- 440 Ward, J. V., 1994. Ecology of alpine streams. *Freshwater Biology* 32:277-294.
- 441 Waters, T. F., 1969. Sub-sampler for dividing large samples of stream invertebrate drift.  
442 *Limnology and Oceanography* 14:813-815.
- 443 Wickham, H. 2011. The Split-Apply-Combine Strategy for Data Analysis. 2011 40:29.
- 444 Wilhelm, L., G. A. Singer, C. Fasching, T. J. Battin & K. Besemer. 2013. Microbial biodiversity  
445 in glacier-fed streams. *ISME Journal* 7:1651-1660.

446

## TABLES

447 Table 1. Key characteristics of the study streams and sites in the Teton Range, Wyoming, USA.

448 Distances to source (*D*) are cumulative. Both elevation and *D* are in meters.

| Stream              | Code | Site  | Type        | Lat., Long.      | Elev. | <i>D</i> |
|---------------------|------|-------|-------------|------------------|-------|----------|
| Petersen Glacier    | PG   | Upper | Glacier-fed | 43.782, -110.846 | 2,922 | 51       |
|                     |      | Lower | Glacier-fed | 43.785, -110.841 | 2,900 | 673      |
| Middle Teton        | MT   | Upper | Glacier-fed | 43.728, -110.795 | 2,955 | 178      |
|                     |      | Lower | Glacier-fed | 43.725, -110.790 | 2,802 | 780      |
| South Cascade Creek | SCC  | Upper | Icy seep    | 43.722, -110.838 | 3,152 | 165      |
|                     |      | Lower | Icy seep    | 43.729, -110.837 | 2,943 | 1,051    |
| Wind Cave           | WC   | Upper | Icy seep    | 43.666, -110.961 | 2,692 | 29       |
|                     |      | Lower | Icy seep    | 43.667, -110.955 | 2,564 | 144      |
| S. Fork Teton Creek | SFT  | Upper | Snowmelt    | 43.691, -110.843 | 2,987 | 1,227    |
|                     |      | Lower | Snowmelt    | 43.693, -110.859 | 2,881 | 2,757    |
| N. Fork Teton Creek | NFT  | Upper | Snowmelt    | 43.777, -110.860 | 2,955 | 9        |
|                     |      | Lower | Snowmelt    | 43.775, -110.861 | 2,910 | 393      |

449

450 Table 2. Environmental characteristics of the streams and sites included in this study.  $T_{\text{YEAR}}$ :  
 451 mean temperature for a calendar year.  $T_{\text{SUM}}$ : mean temperature between the summer solstice (21  
 452 June) and autumn equinox (22 September).  $T_{\text{RANGE}}$ : the difference between the maximum and  
 453 minimum temperatures recorded in the stream during the calendar year.  $S_{\text{ON}}$  and  $S_{\text{OFF}}$  indicate  
 454 the day of the year when a site was covered ( $S_{\text{ON}}$ ) or uncovered ( $S_{\text{OFF}}$ ) by snow according to  
 455 thermographs.  $S_{\text{DURATION}}$  ( $S_{\text{DUR}}$  below) is the approximate total number of days each site spent  
 456 under snow in 2015-2016. Abbreviations and units: temperature (T; °C), dissolved oxygen (DO,  
 457 percent saturation), specific conductivity (SPC;  $\mu\text{S cm}^{-1}$ ), oxidation-reduction potential (ORP,  
 458 mV), total suspended solids (TSS; g/L; upper sites only) and the Pfankuch Index (PI; higher  
 459 values correspond to a less stable streambed). All data (except for  $S_{\text{ON}}$ ,  $S_{\text{OFF}}$ , and  $S_{\text{DUR}}$ ) are for  
 460 2015 only. Stream codes are provided in Table 1.

| Stream | Site  | $T_{\text{YEAR}}$ | $T_{\text{SUM}}$ | $T_{\text{RANGE}}$ | $S_{\text{ON}}$ | $S_{\text{OFF}}$ | $S_{\text{DUR}}$ | DO  | SPC   | pH  | ORP   | TSS   | PI |
|--------|-------|-------------------|------------------|--------------------|-----------------|------------------|------------------|-----|-------|-----|-------|-------|----|
| PG     | Upper | 0.6               | 1.4              | 13.7               | 306             | 195              | 254              | 118 | 3.7   | 7.9 | 128.4 | 0.21  | 42 |
|        | Lower | 1.9               | 6.0              | 16.2               | 303             | 128              | 190              | 103 | 9.9   | 8.6 | 24.8  | --    | 23 |
| MT     | Upper | 0.7               | 1.7              | 10.3               | 300             | 128              | 193              | 101 | 4.8   | 8.4 | 41.2  | 0.105 | 42 |
|        | Lower | 1.5               | 4.1              | 13.6               | 296             | 150              | 219              | 100 | 5.7   | 8.9 | 62.9  | --    | 30 |
| SCC    | Upper | 0.5               | 1.5              | 10.0               | 298             | 204              | 271              | 104 | 113.2 | 8.5 | -4.6  | 0.033 | 21 |
|        | Lower | 1.5               | 4.6              | 13.0               | 297             | 155              | 223              | 104 | 110.3 | 8.4 | 58.4  | --    | 16 |
| WC     | Upper | 1.7               | 2.9              | 4.4                | No cover        |                  |                  | 102 | 176.8 | 8.6 | 47    | 0.023 | 18 |
|        | Lower | 1.9               | 4.2              | 7.3                | 309             | 98               | 154              | 99  | 175.2 | 8.4 | 77.2  | --    | 18 |
| SFT    | Upper | 1.9               | 7.1              | 17.7               | 300             | 174              | 239              | 101 | 74.3  | 8.6 | -0.2  | 0.013 | 24 |
|        | Lower | Logger failed     |                  |                    |                 |                  |                  | 101 | 114.7 | 8.5 | 23    | --    | 17 |
| NFT    | Upper | 2.5               | 6.6              | 15.2               | 300             | 125              | 190              | 101 | 11.1  | 8.5 | 64.9  | 0.024 | 15 |
|        | Lower | 2.5               | 6.0              | 10.7               | 328             | 133              | 170              | 96  | 11.8  | 7.8 | 89.6  | --    | 18 |

461

## FIGURES

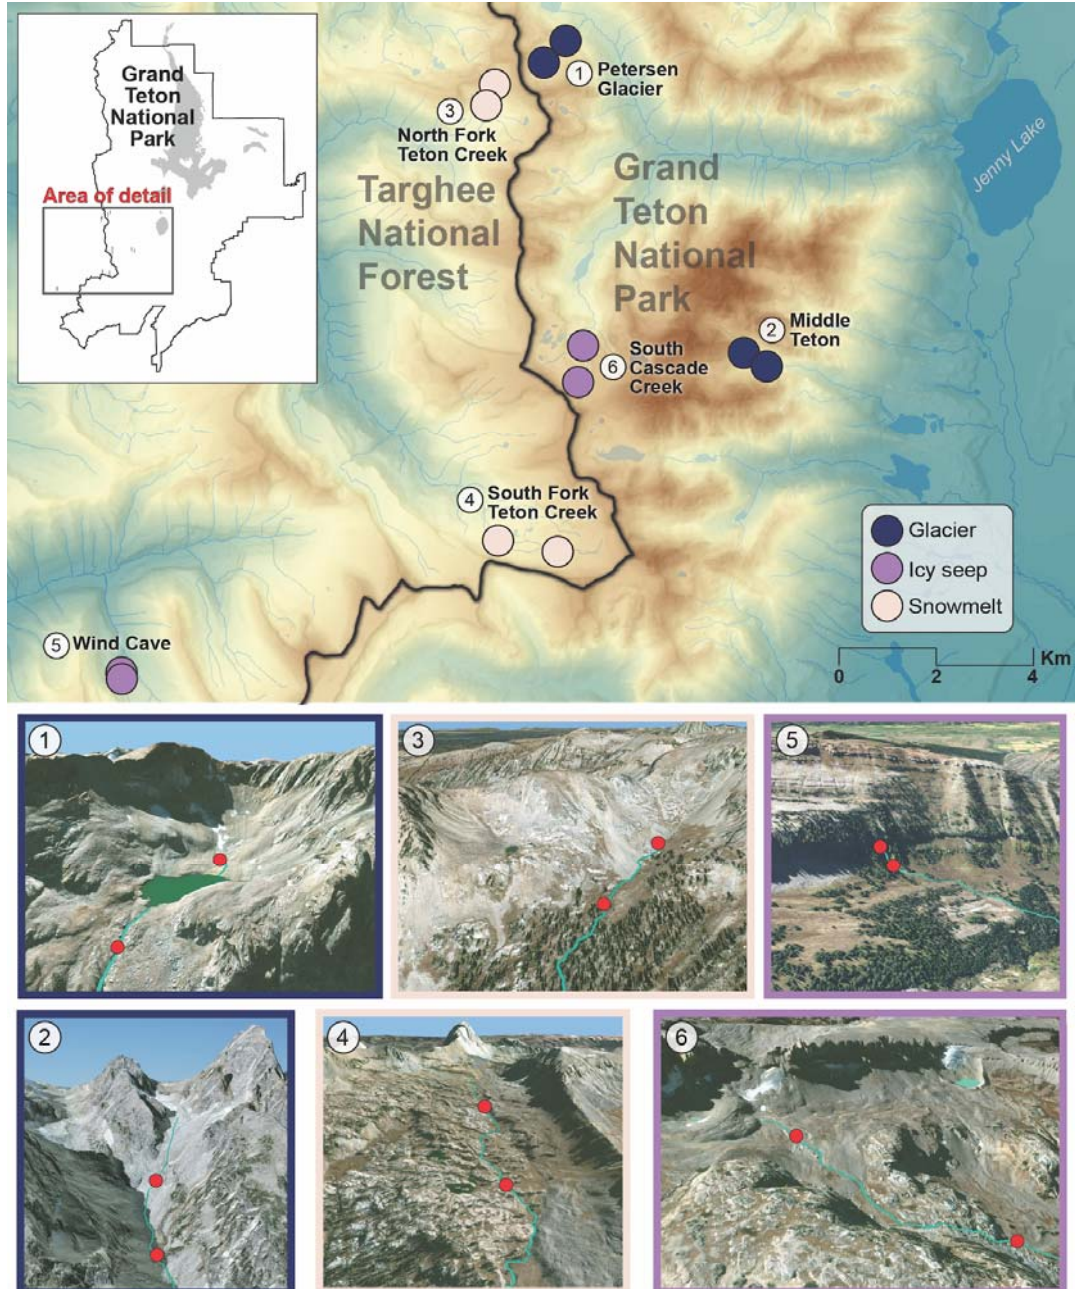

462

463 Figure 1. All streams and sites in the Teton Range, Wyoming, USA, included in this study.

464 Upper sites were selected to be as close to the primary hydrological source as possible. Numbers

465 in the top panel correspond to satellite imagery (DigitalGlobe, 15 October 2015, bottom panel)

466 with stream channel (light blue) and sample sites (red dots) marked.

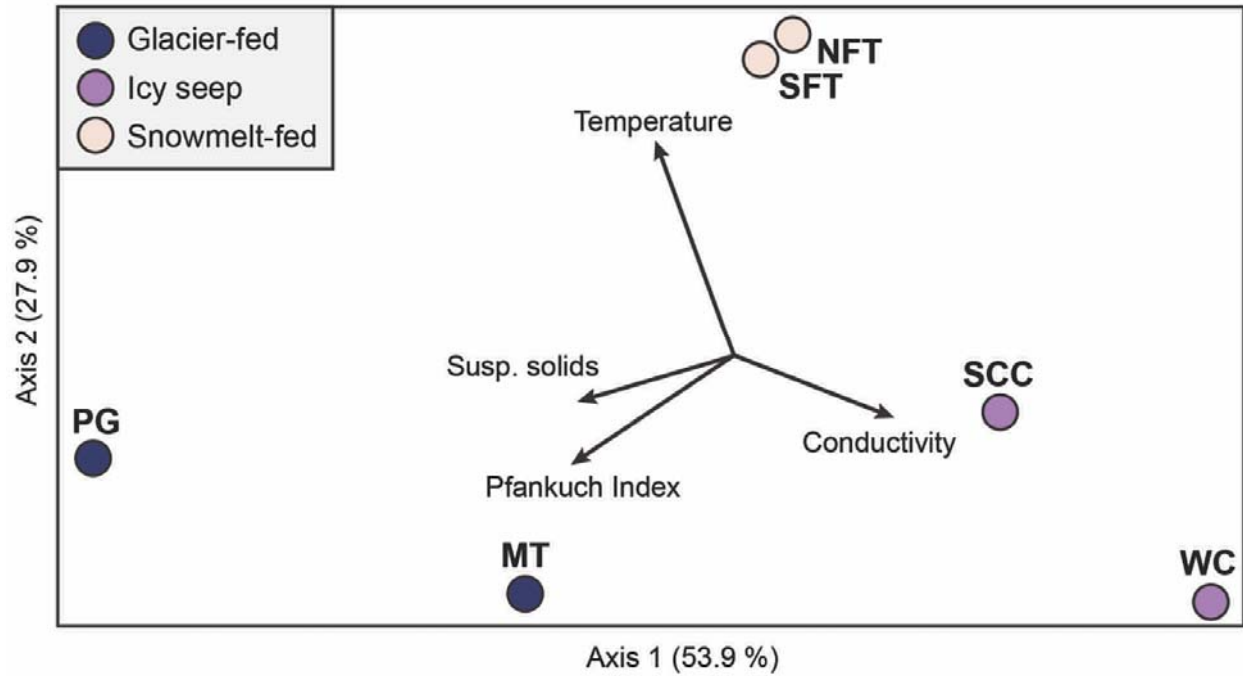

467

468 Figure 2. Principal components analysis (PCA) results showing environmental variation among

469 the upper sites according to the four variables of the glaciality index.



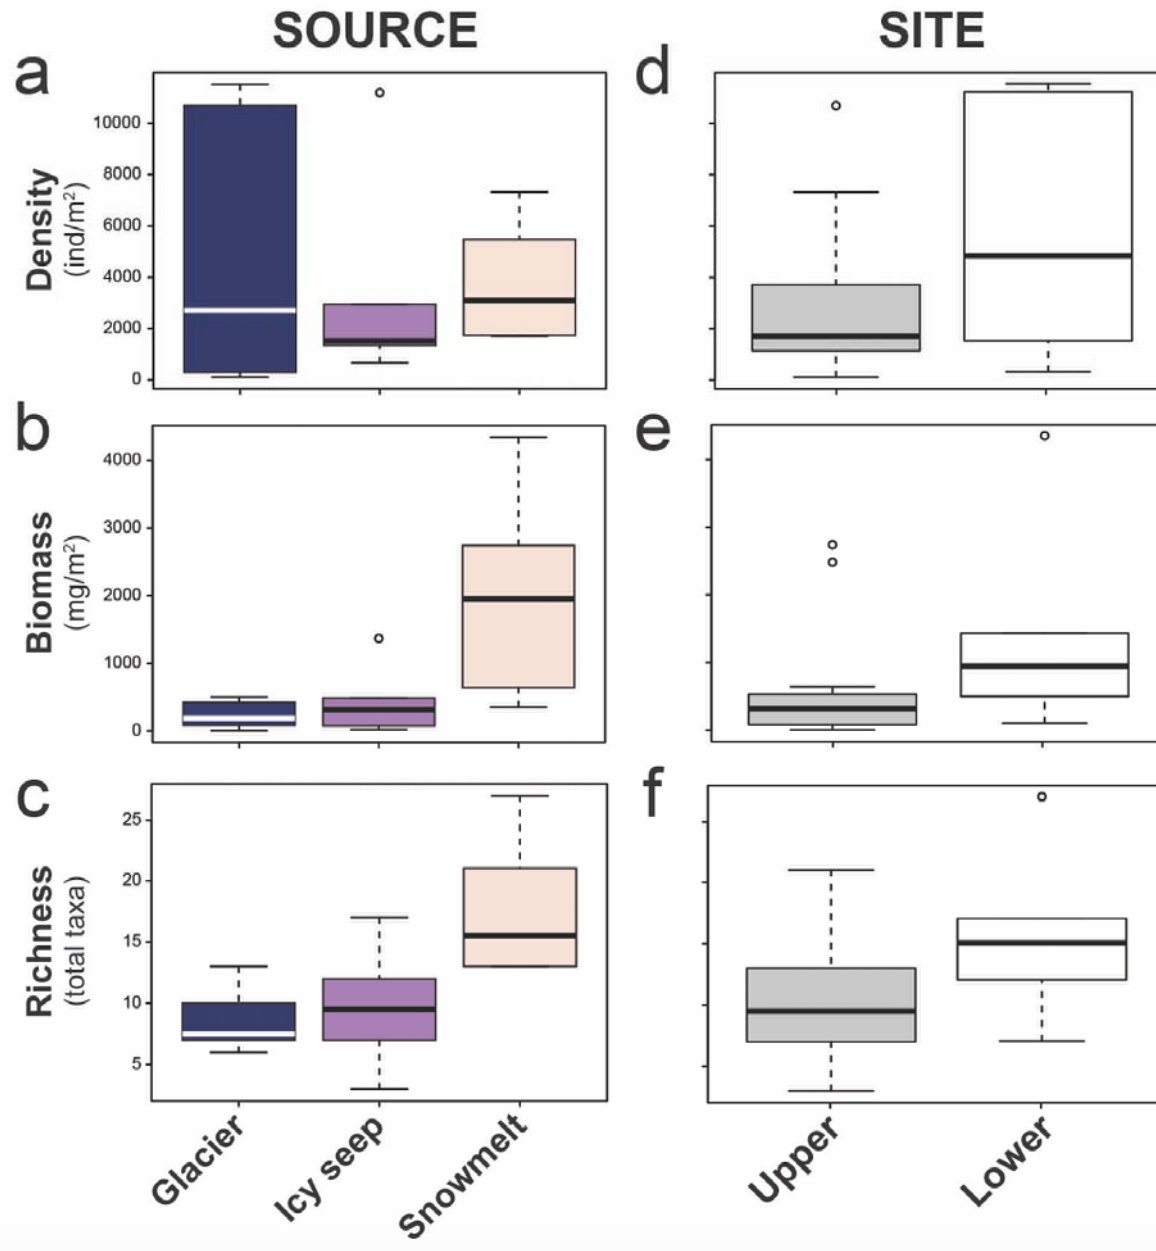

470

471 Figure 3. Macroinvertebrate density, biomass and richness among sites categorized by  
472 hydrologic source (a-c) or site (d-f). Bold lines are median values, lower and upper box limits  
473 indicate the 25<sup>th</sup> and 75<sup>th</sup> percentiles, respectively, and whiskers represent the lower and upper  
474 limits of the data (excluding outliers which are shown as circles).

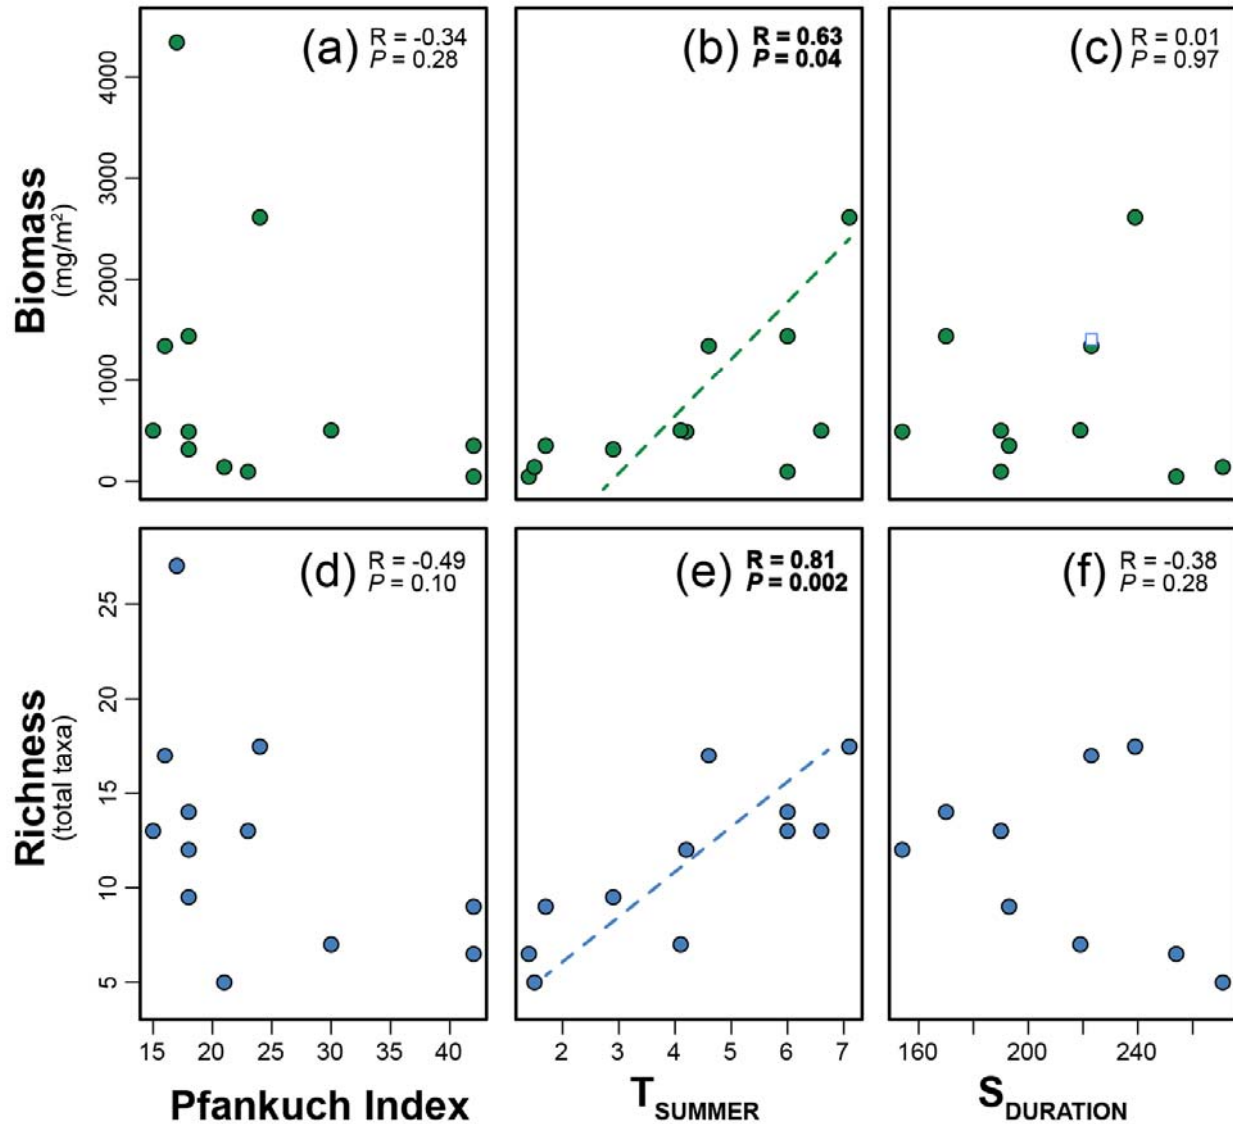

475

476 Figure 4. Bivariate plots of biomass (a-c) and richness (d-f) versus the Pfankuch Index, a

477 measure of stream bed stability (higher = less stable), S<sub>DURATION</sub> (the approximate number of

478 days each stream was snow-covered in 2015-2016), and T<sub>SUMMER</sub> (mean stream temperature

479 between the summer and autumn solstices). Significant Pearson correlations ( $P < 0.05$ ) are in

480 bold with trendlines shown. The number of data points varies across plots due to a lack of snow

481 cover at upper Wind Cave during the study period and a failed temperature logger at lower South

482 Fork Teton Creek (see Table 2).

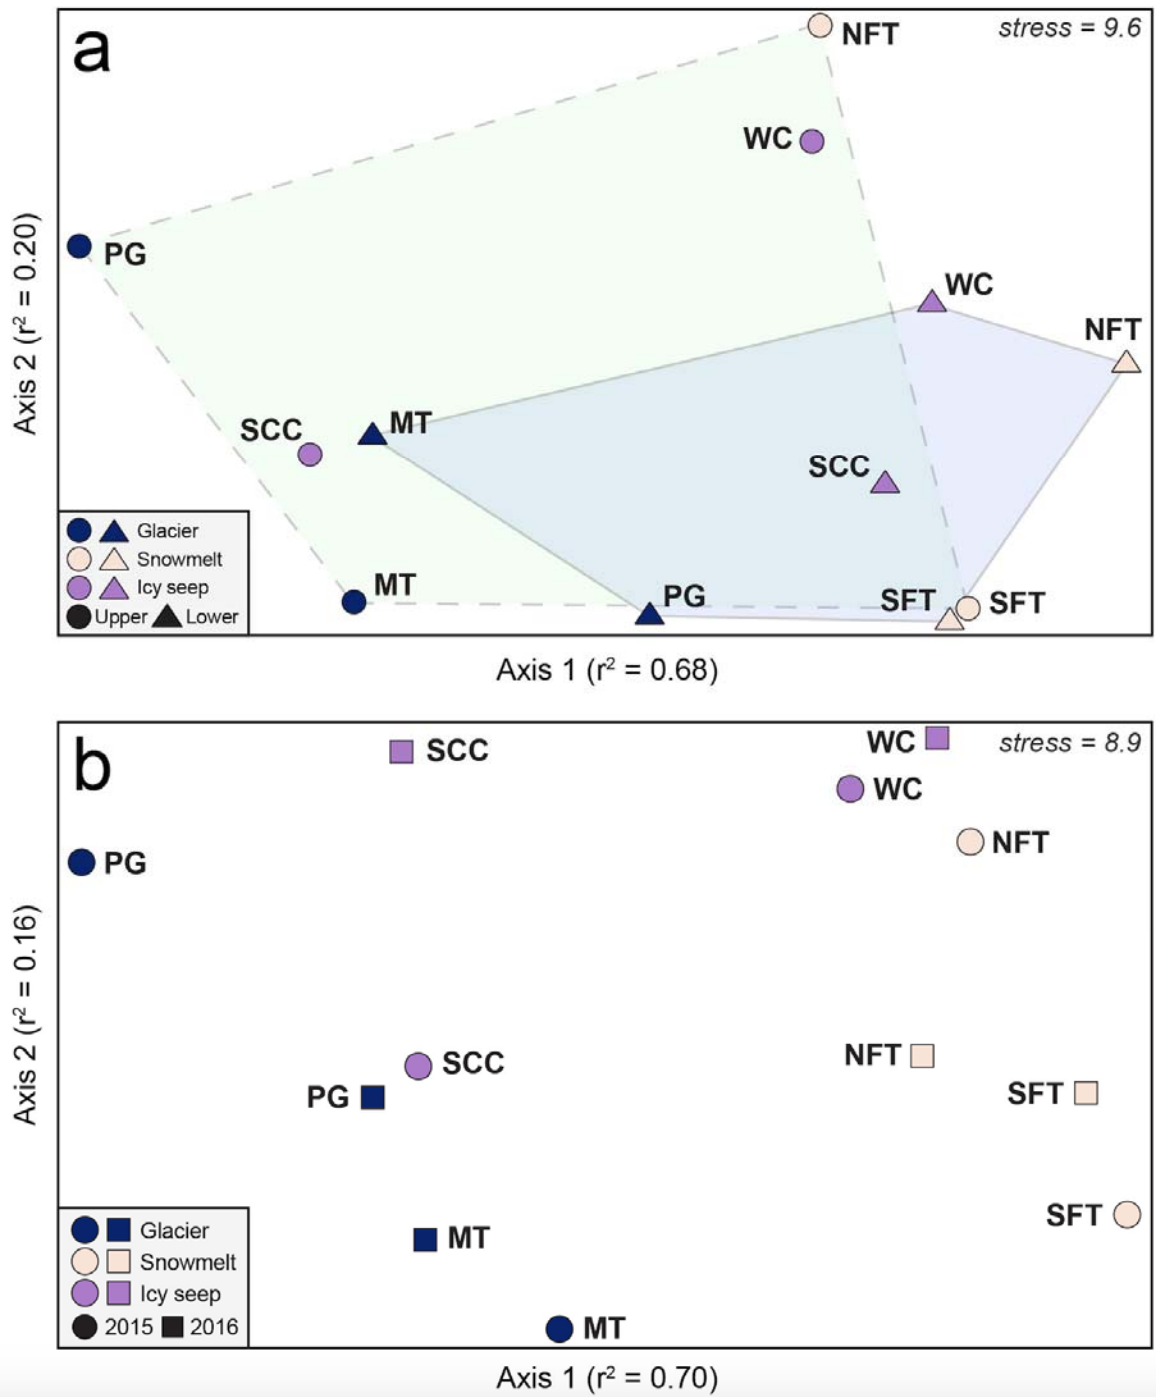

483

484 Figure 5. Non-metric multidimensional scaling (NMS) plots of macroinvertebrate communities

485 comparing (a) upper (circles) versus lower (triangles) sites in 2015 only and (b) upper sites only

486 between 2015 (circles) and 2016 (squares). Colored polygons in (a) reflect the breadth of NMS

487 space occupied by upper (dashed lines, green fill) and lower (solid lines, blue fill) sites.
